# Supplementary material
Source: publisher figshare collection journal article supplement (https://karger.figshare.com/ndownloader/files/17433959)
Supplement: Supplementary file 1 [file 17433959]

**Supplemental Table 4.** Risk factors of impaired neurodevelopmental outcome

|  | MDI < 70 (n=12) | | |  | PDI < 70 (n=24) | | |
| --- | --- | --- | --- | --- | --- | --- | --- |
|  | OR | 95% CI | P value |  | OR | 95% CI | P value |
| female gender | 0.7 | 0.17 to 2.75 | 0.7633 |  | 1.24 | 0.45 to 3.42 | 0.8178 |
| small for gestational age | 0.9 | 0.09 to 4.78 | 1 |  | 1.23 | 0.26 to 4.66 | 0.7477 |
| < 27 weeks GA | 3.3 | 0.82 to 13.91 | 0.0570 |  | 2.05 | 0.73 to 5.74 | 0.1435 |
| antenatal betametasone | 0.4 | 0.08 to 2.55 | 0.1832 |  | 0.67 | 0.17 to 3.23 | 0.5050 |
| amniotic infection syndrome | 6.4 | 1.48 to 38.81 | **0.0081** |  | 1.33 | 0.47 to 3.68 | 0.6328 |
| five minutes Apgar score < 7 | 2.6 | 0.51 to 10.77 | 0.2252 |  | 1.35 | 0.34 to 4.64 | 0.5577 |
| inotropic support | 4.4 | 0.37 to 31.51 | 0.1283 |  | 2.89 | 0.39 to 18.57 | 0.1745 |
| treated PDA | 1.7 | 0.43 to 8.18 | 0.5455 |  | 1.65 | 0.59 to 4.96 | 0.3547 |
| postnatal sepsis | 2.7 | 0.68 to 13.03 | 0.1322 |  | 1.76 | 0.64 to 4.97 | 0.2531 |
| necrotising enterocolitis | 3.1 | 0.12 to 80 | 1 |  | 11.04 | 0.44 to 280 | 0.2182 |
| focal intestinal perforation | 12.1 | 1.42 to 104.55 | **0.0107** |  | 5.87 | 0.63 to 74.31 | 0.0683 |
| multiple birth | 0.2 | 0.01 to 1.30 | 0.1018 |  | 0.69 | 0.20 to 2.08 | 0.6193 |
| postnatal hydrocortisone | 9.4 | 1.92 to 44.89 | **0.0025** |  | 4.19 | 0.87 to 20.27 | **0.0385** |
| oxygen at 36 weeks | 3.2 | 0.48 to 15.48 | 0.1242 |  | 3.46 | 0.75 to 15.29 | 0.0598 |
| IVH ≥III° in CUS | 10.14 | 0.12 to 828 | 0.1781 |  | 19.22 | 0.89 to 415 | **0.046** |
| severe white matter injury1 | 2.98 | 0.05 to 39 | 0.3656 |  | 1.73 | 0.03 to 21 | 0.5176 |
| severe CBH1 | 0 | 0 to 510 | 1 |  | 0 | 0.17 to 1032 | 0.1311 |
| small BPW2 | 1.7 | 0.39 to 6.59 | 0.5132 |  | 2.17 | 0.77 to 6.1 | 0.1359 |
| enlarged IHD (≥4mm) | 1.5 | 0.35 to 5.83 | 0.5327 |  | 0.81 | 0.25 to 2.35 | 0.8074 |

Significant P values (P < 0.05) are written in bold. MDI, mental developmental index; PDI, psychomotor developmental index; OR, odds ratio; CI, confidence interval; GA, gestational age; treated PDA, patent ductus arteriosus (pharmacological and/or surgical treatment); IVH, intraventricular haemorrhage; CUS, cranial ultrasound; CBH, cerebellar haemorrhage. 1severe = score ≥3; 2small BPW = biparietal width z score < -0.5 among cohort

|  |  |
| --- | --- |
